# Supplementary material for: First Record of a Suspected Human-Pathogenic Borrelia Species in Populations of the Bat Tick Carios vespertilionis in Sweden
Source: MDPI journal article supplement (doi:10.3390/microorganisms9051100), 2021-05-20
Supplement: s1 [file s1]

## **Additional file 1. Aligned *Borrelia* nucleotide sequences based on PCR-products**

The identifier line, which begins with '>', gives the name of the **sample ID\_microorganism\_gene target\_tick species\_developmental stage of tick\_year of collection\_sample location**

### **'*Borrelia* sp. CvBat 16S-23S IGS'**

**>176\_Borrelia\_16S-23S ribosomal RNA gene, partial sequence\_Carios  
vespertilionis\_nymph\_2018\_Uppland**

AAGTGTGGCTGGATCACCTCCTTTCTAAGAGAAAGGTATTATTTAAAGGTAAATTATGTTTTAACTCTTCCTTTG  
TCTTTTCAAAGACTGTTTTGGGGGTTTAGCTCAGTTGGTTTAGAGCATCGGCTTTGCAAGCCGGGGGTCAAG  
GGTTCGAGTCCCTTAACCTCCATTTATTTTAGGCCAAATAAATGGAGGTTATGATTAGAGGTAATGCTATGTTA  
GTTGTAGCTAAATTTAAAATTGTTAAAAATACATTTTAATTTATTATCTAAACAATGTGTTTTATTGCGTCGTT  
AATTAAGTAAAGTTGTTTACGTGTGGCAAGTCATGATAAGTGATCTTAATTTGATTTTGTTTTTATTTTTGTTT  
GTATTCGTTATAATAAATTTTTGATTTTAAAGATGTGGGTTTAGGACTTGTAATCACTAAGTGAAGACATTTTC  
TTAAATATTTGGATGTTTCTTTAAACG

**>179\_Borrelia\_16S-23S ribosomal RNA gene, partial sequence\_Carios  
vespertilionis\_nymph\_2018\_Uppland**

AAGTGTGGCTGGATCACCTCCTTTCTAAGAGAAAGGTATTATTTAAAGGTAAATTATGTTTTAACTCTTCCTTTG  
TCTTTTCAAAGACTGTTTTGGGGGTTTAGCTCAGTTGGTTTAGAGCATCGGCTTTGCAAGCCGGGGGTCAAG  
GGTTCGAGTCCCTTAACCTCCATTTATTTTAGGCCAAATAAATGGAGGTTATGATTAGAGGTAATGCTATGTTA  
GTTGTAGCTAAATTTAAAATTGTTAAAAATACATTTTAATTTATTATCTAAACAATGTGTTTTATTGCGTCGTT  
AATTAAGTAAAGTTGTTTACGTGTGGCAAGTCATGATAAGTGATCTTAATTTGATTTTGTTTTTATTTTTGTTT  
GTATTCGTTATAATAAATTTTTGATTTTAAAGATGTGGGTTTAGGACTTGTAATCACTAAGTGAAGACATTTTC  
TTAAATATTTGGATGTTTCTT

**>194\_Borrelia\_16S-23S ribosomal RNA gene, partial sequence\_Carios  
vespertilionis\_larva\_2018\_Uppland**

AAGTGTGGCTGGATCACCTCCTTTCTAAGAGAAAGGTATTATTTAAAGGTAAATTATGTTTTAACTCTTCCTTTG  
TCTTTTCAAAGACTGTTTTGGGGGTTTAGCTCAGTTGGTTTAGAGCATCGGCTTTGCAAGCCGGGGGTCAAG  
GGTTCGAGTCCCTTAACCTCCATTTATTTTAGGCCAAATAAATGGAGGTTATGATTAGAGGTAATGCTATGTTA  
GTTGTAGCTAAATTTAAAATTGTTAAAAATACATTTTAATTTATTATCTAAACAATGTGTTTTATTGCGTCGTT  
AATTAAGTAAAGTTGTTTACGTGTGGCAAGTCATGATAAGTGATCTTAATTTGATTTTGTTTTTATTTTTGTTT  
GTATTCGTTATAATAAATTTTTGATTTTAAAGATGTGGGTTTAGGACTTGTAATCACTAAGTGAAGACATTTTC  
TTAAATATTTGGATGTTTCTTTAAACGAG

**>197\_Borrelia\_16S-23S ribosomal RNA gene, partial sequence\_Carios  
vespertilionis\_nymph\_2018\_Uppland**

GTGTGGCTGGATCACCTCCTTTCTAAGAGAAAGGTATTATTTAAAGGTAAATTATGTTTTAACTCTTCCTTTGTC  
TTTTCAAAGACTGTTTTGGGGGTTTAGCTCAGTTGGTTTAGAGCATCGGCTTTGCAAGCCGGGGGTCAAGGG  
TTCGAGTCCCTTAACCTCCATTTATTTAGGCCAAATAAATGGAGGTTATGATTAGAGGTAATGCTATGTTAGTT  
GTAGCTAAATTTAAAATTGTTAAAAATACATTTTAATTTATTATCTAAACAATGTGTTTTATTGCGTCGTTAAT  
TAAGTAAAGTTGTTTACGTGTGGCAAGTCATGATAAGTGATCTTAATTTGATTTTGTTTTTATTTTTGTTTGTA  
TTCGTTATAATAAATTTTTGATTTTAAAGATGTGGGTTTAGGACTTGTAATCACTAAGTGAAGACATTTCTTT  
AAATATTTGGATGTTTCTTTAAACGAGTCCTAGTAAATTGGGACCAGGAGGAGTTGAA

**>201\_Borrelia\_16S-23S ribosomal RNA gene, partial sequence\_Carios  
vespertilionis\_larva\_2018\_Uppland**

AAGTGTGGCTGGATCACCTCCTTTCTAAGAGAAAGGTATTATTTAAAGGTAAATTATGTTTTAACTCTTCCTTTG  
TCTTTTCAAAGACTGTTTTTGGGGGTTTAGCTCAGTTGGTTTAGAGCATCGGCTTTGCAAGCCGGGGGTCAAG  
GGTTCGAGTCCCTTAACCTCCATTTATTTTAGGCCAAATAAATGGAGGTTATGATTAGAGGTAATGCTATGTTA  
GTTGTAGCTAAATTTAAAATTGTTAAAAATACATTTTAATTTTATTATCTAAACAATGTGTTTTATTGCGTCGTT  
AATTAAGTAAAGTTGTTTACGTGTGGCAAGTCATGATAAGTGATCTTAATTTGATTTTGTTTTTATTTTTGTTT  
GTATTCGTTATAATAAATTTTTGATTTTAAAGATGTGGGTTTAGGACTTGTAATCACTAAGTGAAGACATTTT  
TTAAATATTTGGATGTTTCTTTAAACGAGTCCTAGTAAATTGGGACCAGGAGGAG

**>205\_Borrelia\_16S-23S ribosomal RNA gene, partial sequence\_Carios  
vespertilionis\_larva\_2018\_Uppland**

GTGTGGCTGGATCACCTCCTTTCTAAGAGAAAGGTATTATTTAAAGGTAAATTATGTTTTAACTCTTCCTTTGTC  
TTTTCAAAGACTGTTTTTGGGGGTTTAGCTCAGTTGGTTTAGAGCATCGGCTTTGCAAGCCGGGGGTCAAGGG  
TTCGAGTCCCTTAACCTCCATTTATTTTAGGCCAAATAAATGGAGGTTATGATTAGAGGTAATGCTATGTTAGTT  
GTAGCTAAATTTAAAATTGTTAAAAATACATTTTAATTTTATTATCTAAACAATGTGTTTTATTGCGTCGTTAAT  
TAAGTAAAGTTGTTTACGTGTGGCAAGTCATGATAAGTGATCTTAATTTGATTTTGTTTTTATTTTTGTTTGTA  
TTCGTTATAATAAATTTTTGATTTTAAAGATGTGGGTTTAGGACTTGTAATCACTAAGTGAAGACATTTCTTT  
AAATATTTGGATGTTTCTTTAAACGAGTCCTAGTAAATTGGGACCAGGAGGAGTTGAACCTCCGACC

**>208\_Borrelia\_16S-23S ribosomal RNA gene, partial sequence\_Carios  
vespertilionis\_larva\_2018\_Uppland**

AAGTGTGGCTGGATCACCTCCTTTCTAAGAGAAAGGTATTATTTAAAGGTAAATTATGTTTTAACTCTTCCTTTG  
TCTTTTCAAAGACTGTTTTTGGGGGTTTAGCTCAGTTGGTTTAGAGCATCGGCTTTGCAAGCCGGGGGTCAAG  
GGTTCGAGTCCCTTAACCTCCATTTATTTTAGGCCAAATAAATGGAGGTTATGATTAGAGGTAATGCTATGTTA  
GTTGTAGCTAAATTTAAAATTGTTAAAAATACATTTTAATTTTATTATCTAAACAATGTGTTTTATTGCGTCGTT  
AATTAAGTAAAGTTGTTTACGTGTGGCAAGTCATGATAAGTGATCTTAATTTGATTTTGTTTTTATTTTTGTTT  
GTATTCGTTATAATAAATTTTTGATTTTAAAGATGTGGGTTTAGGACTTGTAATCACTAAGTGAAGACATTTT  
TTAAATATTTGGATGTTTCTTTAAACGAGTCCTAGTAAATTGGGACCAGGAGGAGTTGAACCTCC

**>218\_Borrelia\_16S-23S ribosomal RNA gene, partial sequence\_Carios  
vespertilionis\_adult\_2015\_Uppland**

AAGTGTGGCTGGATCACCTCCTTTCTAAGAGAAAGGTATTATTTAAAGGTAAATTATGTTTTAACTCTTCCTTTG  
TCTTTTCAAAGACTGTTTTTGGGGGTTTAGCTCAGTTGGTTTAGAGCATCGGCTTTGCAAGCCGGGGGTCAAG  
GGTTCGAGTCCCTTAACCTCCATTTATTTTAGGCCAAATAAATGGAGGTTATGATTAGAGGTAATGCTATGTTA  
GTTGTAGCTAAATTTAAAATTGTTAAAAATACATTTTAATTTTATTATCTAAACAATGTGTTTTATTGCGTCGTT  
AATTAAGTAAAGTTGTTTACGTGTGGCAAGTCATGATAAGTGATCTTAATTTGATTTTGTTTTTATTTTTGTTT  
GTATTCGTTATAATAAATTTTTGATTTTAAAGATGTGGGTTTAGGACTTGTAATCACTAAGTGAAGACATTTT  
TTAAATATTTGGATGTTTCTTTAAACGAGTCCTAGTAAATTGGGACCAGGAGGAGTTGAACCTCC

**>437\_Borrelia\_16S-23S ribosomal RNA gene, partial sequence\_Carios  
vespertilionis\_nymph\_2015\_Uppland**

AGTGTGGCTGGATCACCTCCTTTCTAAGAGAAAGGTATTATTTAAAGGTAAATTATGTTTTAACTCTTCCTTTGT  
CTTTTCAAAGACTGTTTTTGGGGGTTTAGCTCAGTTGGTTTAGAGCATCGGCTTTGCAAGCCGGGGGTCAAGG  
GTTTCGAGTCCCTTAACCTCCATTTATTTTAGGCCAAATAAATGGAGGTTATGATTAGAGGTAATGCTATGTTAG  
TTGTAGCTAAATTTAAAATTGTTAAAAATACATTTTAATTTTATTATCTAAACAATGTGTTTTATTGCGTCGTTA  
ATTAAGTAAAGTTGTTTACGTGTGGCAAGTCATGATAAGTGATCTTAATTTGATTTTGTTTTTATTTTTGTTTG  
TATTCGTTATAATAAATTTTTGATTTTAAAGATGTGGGTTTAGGACTTGTAATCACTAAGTGAAGACATTTCT  
TTAAATATTTGGATGTTTCTTTAAACGAGTCCT

**>181\_Borrelia\_16S-23S ribosomal RNA gene, partial sequence\_Carios  
vespertilionis\_adult\_2015\_Uppland**

AGTGTGGCTGGATCACCTCCTTTCTAAGAGAAAGGTATTATTTAAAGGTAAATTATGTTTTAACTCTTCCTTTGT  
CTTTTCAAAGACTGTTTTTGGGGGTTTAGCTCAGTTGGTTTAGAGCATCGGCTTTGCAAGCCGGGGGTCAAGG  
GTTTCGAGTCCCTTAACCTCCATTTATTTTAGGCCAAATAAATGGAGGTTATGATTAGAGGTAATGCTATGTTAG  
TTGTAGCTAAATTTAAATTGTTAAAAATACATTTTAATTTTATTATCTAAACAATGTGTTTTTATTGCGTCGTTA  
ATTAAGTAAAGTTGTTTACGTGTGGCAAGTCATGATAAGTGATCTTAATTTGATTTTGTGTTTTTATTTTTGTTTG  
TATTCGTTATAATAAATTTTGTATTTAAAGATGTGGGTTTAGGACTTGTAATCACTAAGTGTAAGACATTTCT  
TTAAATATTTGGATGTTTCTTTAAACGAGTCCTAGTAAATTGGGACCAGGAGGAGTTGAACCTCC

**>658\_Borrelia\_16S-23S ribosomal RNA gene, partial sequence\_Carios  
vespertilionis\_adult\_2019\_Småland**

AAGTGTGGCTGGATCACCTCCTTTCTAAGAGAAAGGTATTATTTAAAGGTAAATTATGTTTTAACTCTTCCTTTG  
TCTTTTCAAAGACTGTTTTTGGGGGTTTAGCTCAGTTGGTTTAGAGCATCGGCTTTGCAAGCCGGGGGTCAAG  
GGTTCGAGTCCCTTAACCTCCATTTATTTTAGGCCAAATAAATGGAGGTTATGATTAGAGGTAATGCTATGTTA  
GTTGTAGCTAAATTTAAATTGTTAAAAATACATTTTAATTTTATTATCTAAACAATGTGTTTTTATTGCGTCGTT  
AATTAAGTAAAGTTGTTTACGTGTGGCAAGTCATGATAAGTGATCTTAATTTGATTTTGTGTTTTTATTTTTGTTT  
GTATTCGTTATAATAAATTTTGTATTTAAAGATGTGGGTTTAGGACTTGTAATCACTAAGTGTAAGACATTTCT  
TTAAATATTTGGATGTTTCTTTAAACGAGTCCTAGTAAATTGGGACCAGGAGGAGTTGAACCTCC

**'Borrelia sp. CvBat 16S'**

**>197\_Borrelia\_16S ribosomal RNA gene, partial sequence\_Carios  
vespertilionis\_nymph\_2018\_Uppland**

ACGATGCACACTTGGTGTTAATCGAGAGGTTAGTACCGAAGCTAACGTGTTAAGTGTGCCGCCTGGGGAGTAT  
GCTCGCAAGAGTGAAACTCAAAGGAATTGACGGGGGCCCCGCACAAGCGGTGGAGCATGTGGTTTAATTCGAT  
GATACGCGAGGAACCTTACCAGGGCTTGACATATACAGGATGTAGTTAGAGATAACTATTCCCCGTTTGGGGT  
CTGTATACAGGTGCTGCATGGTTGTCGTCAGCTCGTGCTGTGAGGTGTTGGGTAAAGTCCCGCAACGAGCGCA  
ACCCTTATTGTCTGTTACCAGCATGTAAAGATGGGGACTCAGACGAGACTGCCGGTGATAAG

**>201\_Borrelia\_16S ribosomal RNA gene, partial sequence\_Carios  
vespertilionis\_larva\_2018\_Uppland**

ACGATGCACACTTGGTGTTAATCGAGAGGTTAGTACCGAAGCTAACGTGTTAAGTGTGCCGCCTGGGGAGTAT  
GCTCGCAAGAGTGAAACTCAAAGGAATTGACGGGGGCCCCGCACAAGCGGTGGAGCATGTGGTTTAATTCGAT  
GATACGCGAGGAACCTTACCAGGGCTTGACATATACAGGATGTAGTTAGAGATAACTATTCCCCGTTTGGGGT  
CTGTATACAGGTGCTGCATGGTTGTCGTCAGCTCGTGCTGTGAGGTGTTGGGTAAAGTCCCGCAACGAGCGCA  
ACCCTTATTGTCTGTTACCAGCATGTAAAGATGGGGACTCAGACGAGACTGCCGGTGATAAG

**>208\_Borrelia\_16S ribosomal RNA gene, partial sequence\_Carios  
vespertilionis\_larva\_2018\_Uppland**

ACGATGCACACTTGGTGTTAATCGAGAGGTTAGTACCGAAGCTAACGTGTTAAGTGTGCCGCCTGGGGAGTAT  
GCTCGCAAGAGTGAAACTCAAAGGAATTGACGGGGGCCCCGCACAAGCGGTGGAGCATGTGGTTTAATTCGAT  
GATACGCGAGGAACCTTACCAGGGCTTGACATATACAGGATGTAGTTAGAGATAACTATTCCCCGTTTGGGGT  
CTGTATACAGGTGCTGCATGGTTGTCGTCAGCTCGTGCTGTGAGGTGTTGGGTAAAGTCCCGCAACGAGCGCA  
ACCCTTATTGTCTGTTACCAGCATGTAAAGATGGGGACTCAGACGAGACTGCCGGTGATAAG

**>218\_Borrelia\_16S ribosomal RNA gene, partial sequence\_Carios**

**vespertilionis\_adult\_2015\_Uppland**

ACGATGCACACTTGGTGTTAATCGAGAGGTTAGTACCGAAGCTAACGTGTTAAGTGTGCCGCCTGGGGAGTAT  
GCTCGCAAGAGTGAAACTCAAAGGAATTGACGGGGGCCCGCACAAAGCGGTGGAGCATGTGGTTTAATTCGAT  
GATACGCGAGGAACCTTACCAGGGCTTGACATATACAGGATGTAGTTAGAGATAACTATTCCCCGTTTGGGGT  
CTGTATACAGGTGCTGCATGGTTGTCGTCAGCTCGTGCTGTGAGGTGTTGGGTAAAGTCCCGCAACGAGCGCA  
ACCCTTATTGTCTGTTACCAGCATGTAAAGATGGGGACTCAGACGAGACTGCCGGTGATAAG

**'Borrelia sp. CvBat flaB'**

**>197\_Borrelia\_flas gene, partial sequence\_Carios vespertilionis\_nymph\_2018\_Uppland**

GGAAAATTAACGCTCAAATTAGAGGGTTATCCCAAGCTTCAAGAAATACTTCAAAGGCAATAAATTTTATTCAA  
ACAACAGAAGGAAATTTGGATGAAGTAGAGAAAGTGTGGTGAGAATGAAAGAGCTTGCTGTTCAATCTGGT  
AATGGTACATATTCAGATGCAGACAGAGGTTCTATTAGATTGAAGTTGAGCAACTTACAGATGAGATCAATA  
GAATTGCTGATCAGGCACAATATAACCATATGCATATGTTATCTAATAGATCATCTGCTGAGCATGTAAGAACA  
GCTGAAGAGCTTGGAATGCAACCTGTAAAGATTAATACACCAGCATCATTATCTGGCTCACAAGCTTCATGGAC  
ATTAAGAGTACATGTTGGTGCAAATCAAGATGAAGCAATTGCTGTTAATATTTATGCAGCTAATGTTGCAAATC  
TTTTTTCGGGTGAGGGTGCTCAACAAGTAGCTCCAGCTCAAGAGGGTGACAGCAAGAAGGAGCACAAGCAG  
CTCCAGCTCCAGCAGCAGCTCCAGCTCAAGGTGGTGTTAACTCTCCAGTTAATGTTACAACCTGCTGTTGATGCT  
AATATGTCACTTACAAAGATAGAAGATGCTATTAGAATGGTAACTGATCAAAGAGCAAATCT

**>201\_Borrelia\_flas gene, partial sequence\_Carios vespertilionis\_larva\_2018\_Uppland**

AAATTAACGCTCAAATTAGAGGGTTATCCCAAGCTTCAAGAAATACTTCAAAGGCAATAAATTTTATTCAAACA  
ACAGAAGGAAATTTGGATGAAGTAGAGAAAGTGTGGTGAGAATGAAAGAGCTTGCTGTTCAATCTGGTAAT  
GGTACATATTCAGATGCAGACAGAGGTTCTATTAGATTGAAGTTGAGCAACTTACAGATGAGATCAATAGAA  
TTGCTGATCAGGCACAATATAACCATATGCATATGTTATCTAATAGATCATCTGCTGAGCATGTAAGAACAGCT  
GAAGAGCTTGGAATGCAACCTGTAAAGATTAATACACCAGCATCATTATCTGGCTCACAAGCTTCATGGACATT  
AAGAGTACATGTTGGTGCAAATCAAGATGAAGCAATTGCTGTTAATATTTATGCAGCTAATGTTGCAAATCTTT  
TTTCGGGTGAGGGTGCTCAACAAGTAGCTCCAGCTCAAGAGGGTGACAGCAAGAAGGAGCACAAGCAGCTC  
CAGCTCCAGCAGCAGCTCCAGCTCAAGGTGGTGTTAACTCTCCAGTTAATGTTACAACCTGCTGTTGATGCTAAT  
ATGTCACTTACAAAGATAGAAGATGCTATTAGAATGGTAACTGATCAAAGAGCAAATCTTG

**>205\_Borrelia\_flas gene, partial sequence\_Carios vespertilionis\_larva\_2018\_Uppland**

GGAAAATTAACGCTCAAATTAGAGGGTTATCCCAAGCTTCAAGAAATACTTCAAAGGCAATAAATTTTATTCAA  
ACAACAGAAGGAAATTTGGATGAAGTAGAGAAAGTGTGGTGAGAATGAAAGAGCTTGCTGTTCAATCTGGT  
AATGGTACATATTCAGATGCAGACAGAGGTTCTATTAGATTGAAGTTGAGCAACTTACAGATGAGATCAATA  
GAATTGCTGATCAGGCACAATATAACCATATGCATATGTTATCTAATAGATCATCTGCTGAGCATGTAAGAACA  
GCTGAAGAGCTTGGAATGCAACCTGTAAAGATTAATACACCAGCATCATTATCTGGCTCACAAGCTTCATGGAC  
ATTAAGAGTACATGTTGGTGCAAATCAAGATGAAGCAATTGCTGTTAATATTTATGCAGCTAATGTTGCAAATC  
TTTTTTCGGGTGAGGGTGCTCAACAAGTAGCTCCAGCTCAAGAGGGTGACAGCAAGAAGGAGCACAAGCAG  
CTCCAGCTCCAGCAGCAGCTCCAGCTCAAGGTGGTGTTAACTCTCCAGTTAATGTTACAACCTGCTGTTGATGCT  
AATATGTCACTTACAAAGATAGAAGATGCTATTAGAATGGTAACTGATCAAAGAGCAAAT

**>208\_Borrelia\_flas gene, partial sequence\_Carios vespertilionis\_larva\_2018\_Uppland**

GGAAAATTAACGCTCAAATTAGAGGGTTATCCCAAGCTTCAAGAAATACTTCAAAGGCAATAAATTTTATTCAA  
ACAACAGAAGGAAATTTGGATGAAGTAGAGAAAGTGTTGGTGAGAATGAAAGAGCTTGCTGTTCAATCTGGT  
AATGGTACATATTCAGATGCAGACAGAGGTTCTATTAGATTGAAGTTGAGCAACTTACAGATGAGATCAATA  
GAATTGCTGATCAGGCACAATATAACCATATGCATATGTTATCTAATAGATCATCTGCTGAGCATGTAAGAACA  
GCTGAAGAGCTTGGAATGCAACCTGTAAAGATTAATACACCAGCATCATTATCTGGCTCACAAGCTTCATGGAC  
ATTAAGAGTACATGTTGGTGCAAATCAAGATGAAGCAATTGCTGTTAATATTTATGCAGCTAATGTTGCAAATC  
TTTTTTCGGGTGAGGGTGCTCAACAAGTAGCTCCAGCTCAAGAGGGTGACAGCAAGAAGGAGCACAAGCAG  
CTCCAGCTCCAGCAGCAGCTCCAGCTCAAGGTGGTGTTAACTCTCCAGTTAATGTTACAACCTGCTGTTGATGCT  
AATATGTCACTTACAAAGATAGAAGATGCTATTAGAATGGTAACTGATCAAAGAGCAAATCT

**>218\_Borrelia\_flbB gene, partial sequence\_Carios vespertilionis\_adult\_2015\_Uppland**

AAAATTAACGCTCAAATTAGAGGGTTATCCCAAGCTTCAAGAAATACTTCAAAGGCAATAAATTTTATTCAAAC  
AACAGAAGGAAATTTGGATGAAGTAGAGAAAGTGTTGGTGAGAATGAAAGAGCTTGCTGTTCAATCTGGTAA  
TGGTACATATTCAGATGCAGACAGAGGTTCTATTAGATTGAAGTTGAGCAACTTACAGATGAGATCAATAGA  
ATTGCTGATCAGGCACAATATAACCATATGCATATGTTATCTAATAGATCATCTGCTGAGCATGTAAGAACAGC  
TGAAGAGCTTGGAATGCAACCTGTAAAGATTAATACACCAGCATCATTATCTGGCTCACAAGCTTCATGGACAT  
TAAGAGTACATGTTGGTGCAAATCAAGATGAAGCAATTGCTGTTAATATTTATGCAGCTAATGTTGCAAATCTT  
TTTTTCGGGTGAGGGTGCTCAACAAGTAGCTCCAGCTCAAGAGGGTGACAGCAAGAAGGAGCACAAGCAGCT  
CCAGCTCCAGCAGCAGCTCCAGCTCAAGGTGGTGTTAACTCTCCAGTTAATGTTACAACCTGCTGTTGATGCTAA  
TATGTCACTTACAAAGATAGAAGATGCTATTAGAATGGTAACTGATCAAAGAGCAAATCT

**>658\_Borrelia\_flbB gene, partial sequence\_Carios vespertilionis\_adult\_2019\_Småland**

GGAAAATTAACGCTCAAATTAGAGGGTTATCCCAAGCTTCAAGAAATACTTCAAAGGCAATAAATTTTATTCAA  
ACAACAGAAGGAAATTTGGATGAAGTAGAGAAAGTGTTGGTGAGAATGAAAGAGCTTGCTGTTCAATCTGGT  
AATGGTACATATTCAGATGCAGACAGAGGTTCTATTAGATTGAAGTTGAGCAACTTACAGATGAGATCAATA  
GAATTGCTGATCAGGCACAATATAACCATATGCATATGTTATCTAATAGATCATCTGCTGAGCATGTAAGAACA  
GCTGAAGAGCTTGGAATGCAACCTGTAAAGATTAATACACCAGCATCATTATCTGGCTCACAAGCTTCATGGAC  
ATTAAGAGTACATGTTGGTGCAAATCAAGATGAAGCAATTGCTGTTAATATTTATGCAGCTAATGTTGCAAATC  
TTTTTTCGGGTGAGGGTGCTCAACAAGTAGCTCCAGCTCAAGAGGGTGACAGCAAGAAGGAGCACAAGCAG  
CTCCAGCTCCAGCAGCAGCTCCAGCTCAAGGTGGTGTTAACTCTCCAGTTAATGTTACAACCTGCTGTTGATGCT  
AATATGTCACTTACAAAGATAGAAGATGCTATTAGAATGGTAACTGATCAAAGAGCAAATCT
